# Modified Mediterranean Diet Score and Cardiovascular Risk in a North American Working Population

Justin Yang<sup>1,2</sup>, Andrea Farioli<sup>1,3</sup>, Maria Korre<sup>1,2</sup>, Stefanos N. Kales<sup>1,2\*</sup>

**1** Department of Environmental Health, Environmental & Occupational Medicine & Epidemiology, Harvard School of Public Health, Boston, Massachusetts, United States of America, **2** The Cambridge Health Alliance, Harvard Medical School, Cambridge, Massachusetts, United States of America, **3** Department of Medical and Surgical Sciences, University of Bologna, Bologna, Italy

## Abstract

**Introduction:** Greater adherence to a Mediterranean diet is linked to lower risk for cardiovascular morbidity/mortality in studies of Mediterranean cohorts, older subjects, and/or those with existing health conditions. No studies have examined the effects of this dietary pattern in younger working populations in the United States. We investigated the effects of Mediterranean diet adherence on cardiovascular disease (CVD) biomarkers, metabolic syndrome and body composition in an occupationally active, non-Mediterranean cohort.

**Methods:** A cross-sectional study in a cohort of 780 career male firefighters, ages 18 years or older, from the United States Midwest. No dietary intervention was performed. A modified Mediterranean diet score (mMDS) was developed for assessment of adherence to a Mediterranean dietary pattern from a previously administered life-style questionnaire that examined pre-existing dietary habits. Clinical data from fire department medical examinations were extracted and analyzed.

**Results:** Obese subjects had significantly lower mMDS, and they reported greater fast/take-out food consumption ( $p < 0.001$ ) and intake of sweetened drinks during meals ( $p = 0.002$ ). After multivariate adjustment, higher mMDS was inversely related to risk of weight gain over the past 5 years (odds ratio [OR]: 0.57, 95% confidence interval [CI]: 0.39–0.84,  $p$  for trend across score quartiles: 0.01); as well as the presence of metabolic syndrome components (OR: 0.65, 95% CI: 0.44–0.94,  $p$  for trend across score quartiles: 0.04). Higher HDL-cholesterol ( $p = 0.008$ ) and lower LDL-cholesterol ( $p = 0.04$ ) were observed in those with higher mMDS in linear regression after multivariate adjustment for age, BMI and physical activity.

**Conclusions:** In a cohort of young and active US adults, greater adherence to a Mediterranean-style dietary pattern had significant inverse associations with metabolic syndrome, LDL-cholesterol and reported weight gain, and was significantly and independently associated with higher HDL-cholesterol. Our results support the potential effectiveness of this diet in young, non-Mediterranean working cohorts, and justify future intervention studies.

**Citation:** Yang J, Farioli A, Korre M, Kales SN (2014) Modified Mediterranean Diet Score and Cardiovascular Risk in a North American Working Population. PLoS ONE 9(2): e87539. doi:10.1371/journal.pone.0087539

**Editor:** Yan Gong, College of Pharmacy, University of Florida, United States of America

**Received:** August 12, 2013; **Accepted:** December 30, 2013; **Published:** February 4, 2014

**Copyright:** © 2014 Yang et al. This is an open-access article distributed under the terms of the Creative Commons Attribution License, which permits unrestricted use, distribution, and reproduction in any medium, provided the original author and source are credited.

**Funding:** Supported in part by grants from the U.S. Department of Homeland Security (EMW-2006-FP-01493 and EMW-2009-FP-00835 to Dr. Kales). No additional external funding received for this study. The funders had no role in study design, data collection and analysis, decision to publish, or preparation of the manuscript.

**Competing Interests:** Dr. Kales reports serving as a paid expert witness, independent medical examiner, or both, in workers' compensation and disability cases, including cases involving firefighters. No other disclosures were reported. This does not alter the authors' adherence to all the PLOS ONE policies on sharing data and materials.

\* E-mail: skales@hsph.harvard.edu

## Introduction

Lifestyle behaviors have long been correlated with lowering cardiovascular disease (CVD) risk. [1] In particular, the Mediterranean diet has consistently been associated with better health status, decreased all-cause mortality and protective/ameliorative effects on chronic diseases. [2–7] Specifically, this type of diet is associated with benefits regarding cardiovascular risk factors such as obesity, hypertension, diabetes mellitus and metabolic syndrome [3,8–11], as well as on the relative risks of CVD-related morbidity and mortality [2,9,12–14].

The Mediterranean diet is collection of similar eating habits traditionally followed in at least 16 countries bordering the Mediterranean Sea. [15] It is characterized by high consumption of olive oil, fruits, vegetables, non-refined breads and cereals,

potatoes, legumes and nuts; moderate consumption of fish and poultry; a low intake of dairy products, red meat, processed meats and sweets; and moderate wine intake with meals. [6,12,15].

Although several studies have measured Mediterranean diet adherence with a scoring system and have reported inverse associations with CVD morbidity and mortality, those investigations were primarily conducted on older subjects, those with existing health conditions and/or among Mediterranean populations. [2,4,6,7,12,15–17] Little is known about the effects of Mediterranean-style diet among young working groups in non-Mediterranean countries. To the best of our knowledge, no studies have examined this dietary pattern in a North American occupational cohort. We investigated a modified Mediterranean diet score (mMDS) to assess Mediterranean diet adherence and its associations in a population of United States (US) Midwestern

firefighters. No intervention was performed. Rather, we investigated the association between cardiovascular risk markers and the extent to which the firefighters' reported dietary habits conformed to a Mediterranean diet pattern using the mMDS.

## Subjects and Methods

### Study Population and Study Design

We conducted a cross-sectional analysis within an ongoing longitudinal study of a young, occupationally active cohort of career male firefighters. The participants were age 18 years or older from 11 fire departments in two Midwestern states. Mediterranean diet adherence was assessed from responses to a life-style questionnaire, and CVD biomarkers were measured during the firefighters' baseline medical evaluations. The cohort and data collection have been described in detail elsewhere. [18,19] Inclusion criteria for the mMDS investigation were: 1) completion of a fire department-sponsored medical examination including a maximal exercise test; 2) completion of the life-style questionnaire; 3) absence of work-restrictions at examination; and 4) signed informed consent.

### Ethics Statement

The study was approved by the Institutional Review Board (IRB) of the Harvard School of Public Health and by local IRBs (Chesapeake IRB and National Development and Research Institute [NDR] IRB).

### Assessment of Adherence to Mediterranean Diet

A modified Mediterranean diet score (mMDS) was developed by examining questions from our existing life-style questionnaire for relevance to Mediterranean diet components and adherence to traditional Mediterranean eating patterns based on previous studies. [4,6,12,13] To construct the scoring system, we identified fifteen question areas including the following food domains: frequency of consuming fast/take-out food; weekly serving(s) of fruit and vegetables; frequency of sweet dessert consumption; cooking oil/fat use (olive oil versus others); weekly fried food consumption; type of breads/starches eaten with meals (refined versus whole grain); frequency of consuming ocean fish; and beverage consumption which included wine/alcohol drinking frequency and type of drink(s) consumed with most meals. **Figure 1** shows the generalized Mediterranean diet component categories and score ranges we developed using our questionnaire.

For each Mediterranean diet-associated question, a 4-point scale was developed where a score of 4 is given to the response that best represents a Mediterranean-style diet, and 0 is assigned to the choice that least conforms to a Mediterranean-style diet. A detailed description of how question responses were coded and mMDS scores were attributed for each item is provided in **Table S1 and Method S1**. For questions on "drinks with most meals" we assigned scores for different types of beverages based on likely calorie intake and antioxidant components per serving. In a working population, meals at the workplace and at home may differ substantially. Hence, we surveyed separately cooking oil use, breads/starches and beverages at home and at work, and then weighted each item's consumption by the proportion of weekly meals each participant reported that he consumed at the workplace or at home, respectively. We scored overall alcohol intake because moderate ethanol consumption is consistently associated with a reduced risk of CVD outcomes. [20] Furthermore, additional points for wine intake were also scored separately because authorities consider wine to be an integral part of Mediterranean diet. [21–23] We then obtained each individual's

final total mMDS by summing the scores across all items. The total mMDS score has a possible range of 0 (no conformity to a Mediterranean-style diet) to 42 (maximal conformity to a Mediterranean-style diet based on our scoring system).

### Assessment of CVD Risk Factors and Covariates

Detailed descriptions of the collection of anthropometric, clinical and laboratory data from this cohort are summarized in previous studies. [24,25] Briefly, body mass index (BMI, kg/m<sup>2</sup>) was recorded for all study subjects from measured height and weight. Body fat (%) was estimated by Bioelectrical Impedance Analyzer (BIA) or with skin fold measures, and was added to the medical evaluation protocol while the study was in progress. Cardio-respiratory fitness was measured using symptom-limited maximal treadmill exercise testing with estimation of oxygen consumption (metabolic equivalents [METs]) according to the Bruce protocol. The prevalence of metabolic syndrome and its individual components among the study population were determined using modified criteria from the Joint Scientific Statement. [26,27].

Reports of weight change over the last 5 years and physical activity were extracted from the lifestyle questionnaire. The following question was used to assess weight change: "In the last 5 years, my body weight has gone...". Possible answers included: down a lot (>10 pounds [>4.54 kg]); down a little (5–10 pounds [2.27–4.54 kg]); not changed (<5 pounds [<2.27 kg]); up a little (5–10 pounds [2.27–4.54 kg]); and up a lot (>10 pounds [>4.54 kg]). Weekly physical activity was estimated from average reported exercise frequency and the average reported duration of aerobic/cardio sessions each week. The product of these two responses yielded the average duration of total weekly aerobic exercise expressed in minutes. [19].

### Statistical Analysis

Statistical analyses were carried out using Stata 12.1 SE (Stata Corp, College Station, TX, US). Trends across ordered groups were analyzed with the Cuzick nonparametric test (continuous variables) or with a score test for linear trend of the log odds (dichotomous variable). Differences in the mean distribution of continuous variables were tested with univariate and multivariate analysis of variance. Linear regression models were fitted to study the effect of a unitary increase in mMDS. We explored the distribution of continuous variables by plotting histograms. We then transformed the following right-skewed variables (METs, triglycerides, total cholesterol, LDL-cholesterol, HDL-cholesterol, total cholesterol/HDL, and blood sugar) by taking their natural logarithm. Finally, we assessed the normality assumption for log-transformed variables by applying the skewness and kurtosis test for normality [28]. We fitted ordered logistic regression models to study naturally ordered dependent variables (i.e. metabolic syndrome score and weight change over the past five years). Parallel regression assumption was tested via the Brant test. A P value of less than 0.05 (two-sided) was considered statistically significant.

## Results

In this study, 780 (97% of the total eligible database) male firefighters met the inclusion criteria and were selected for the main analyses. Twenty-six subjects were excluded due to incomplete information. In **Table 1**, we present the distribution of personal characteristics by stratifying our study population into four BMI categories. The mean mMDS in the study population was 21.3 (SD 5.6) (**Figure 2**). Normal weight subjects had

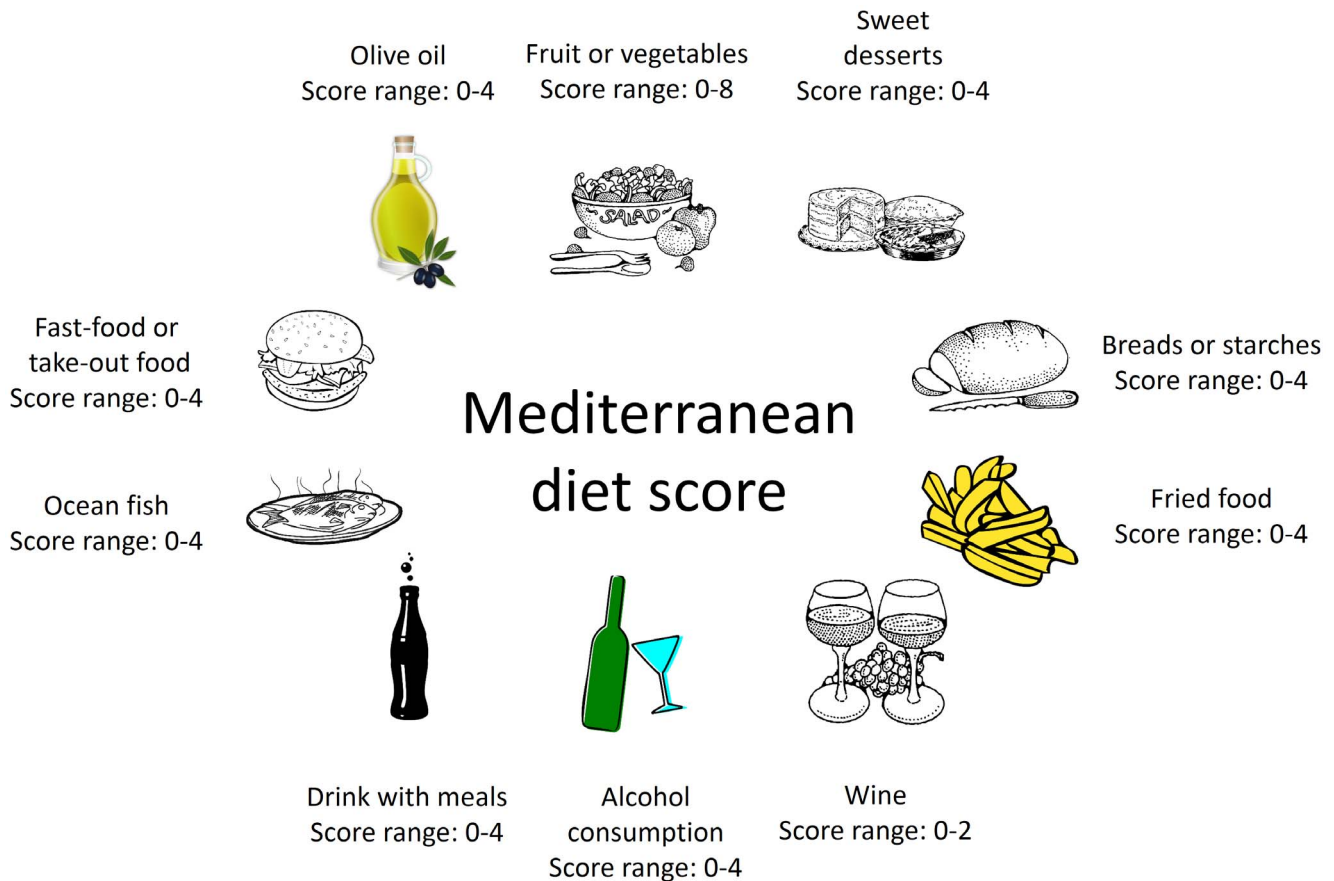

**Figure 1. Mediterranean diet food domains and ranges of modified Mediterranean diet item scores (mMDS) among different categories.**

doi:10.1371/journal.pone.0087539.g001

significantly higher mMDS than obese firefighters ( $p$  for trend 0.008). Beverages taken with meals, both at home and at work, as well as the frequency of eating fast/take-out food were significant determinants for the observed differences in mMDS across BMI categories.

In **Table 2**, we show CVD risk factors stratified by mMDS quartiles. After adjusting for age and BMI, significant inverse associations with mMDS were observed for body fat percentage ( $p = 0.0179$ ), triglycerides ( $p = 0.0463$ ), and total cholesterol to high-density lipoprotein-cholesterol (HDL-c) ratio (TC/HDL-c,  $p < 0.0001$ ), while HDL-c ( $p = 0.0001$ ) and METS ( $p = 0.0047$ ) were positively associated with mMDS. When further adjusted by physical activity, body fat percentage, HDL-c, and TC/HDL-c remained significantly associated with mMDS.

In **Table 3**, we present fully adjusted linear regression models of CVD risk factors and mMDS. For every unit increase of mMDS, we observed a decrease of 0.4% in the geometric mean of low-density lipoprotein-cholesterol (LDL-c), an increase of 0.4% in the geometric mean of HDL-c, and a 0.7% decrease in the TC/HDL-c. Maximal METS achieved were also positively associated with compliance to the Mediterranean diet (0.2% increase per unit increase in mMDS).

The distribution of metabolic syndrome score also varied by mMDS (**Table 4**). In ordered logistic regression analysis, subjects in the highest quartile of mMDS had a 35% lower risk of a one unit increase in metabolic syndrome score (Odds ratio [OR]: 0.65 after adjusted for age and physical activity, 95% confidence

interval [CI]: 0.44–0.94,  $p$  for trend across mMDS quartiles: 0.039).

Subjects with a high mMDS were also less likely to report weight gain over the last 5 years. Using ordered logistic regression, participants in the highest quartile of mMDS showed a significantly reduced odds of weight gain (OR adjusted by age, BMI and physical activity: 0.57, 95%CI: 0.39–0.84,  $p$  for trend across mMDS quartiles: 0.01).

## Discussion

This study provides comprehensive evidence of statistically significant beneficial associations between higher mMDS and CVD risk factors among a young and occupationally active North American cohort. Subjects who were obese had a significantly lower mMDS score. This difference was primarily because obese participants were more inclined to have sweetened drinks or beverages with less nutritional value during meals, and they were more likely to consume fast/take-out foods. We observed higher HDL-c and lower LDL-c in those with better mMDS, which persisted after multivariable adjustment. Furthermore, metabolic syndrome score was inversely associated with Mediterranean-style diet in our study. We also observed a consistent beneficial trend in reported weight gain over the past 5 years among those with lower mMDS, which remained significant after multivariate adjustment. Because we examined the associations of adherence to a Mediterranean dietary pattern based on pre-existing habits without any intervention, our study likely underestimates the

**Table 1.** Descriptive results of characteristics and modified Mediterranean diet scores (mMDS) among 780 subjects.

| Characteristics and mMDS results                                    | Normal weight   | Overweight      | Obese class I   | Obese class II/III | P trend |
|---------------------------------------------------------------------|-----------------|-----------------|-----------------|--------------------|---------|
|                                                                     | (18.5≤BMI≤24.9) | (25.0≤BMI≤29.9) | (30.0≤BMI≤34.9) | (BMI≥35.0)         |         |
|                                                                     | (N = 108)       | (N = 401)       | (N = 203)       | (N = 85)           |         |
| Age, mean (SD)                                                      | 35.6 (10.0)     | 37.2 (8.4)      | 38.9 (8.0)      | 38.6 (8.1)         | <0.001  |
| Body fat percentage, mean (SD) <sup>2</sup>                         | 16.5 (7.0)      | 21.2 (4.2)      | 27.5 (3.0)      | 32.1 (3.9)         | <0.001  |
| Max. METS achieved during ETT, mean (SD)                            | 13.7 (1.6)      | 13.1 (1.5)      | 12.2 (1.8)      | 10.9 (2.0)         | <0.001  |
| Percentage of max. HR achieved during ETT, mean (SD)                | 99.0 (5.2)      | 98.8 (6.2)      | 97.5 (5.7)      | 96.5 (7.1)         | 0.001   |
| Total weekly aerobic exercise (min*wk <sup>-1</sup> ), median (IQR) | 86 (26–131)     | 79 (56–131)     | 79 (56–131)     | 56 (11–124)        | 0.003   |
| Current smoker, n (%)                                               | 19 (17.6)       | 80 (20.0)       | 39 (19.2)       | 19 (22.1)          | 0.563   |
| Number of meals at the firehouse, median (IQR)                      | 6 (3–6)         | 6 (3–6)         | 6 (3–6)         | 6 (4.5–7.5)        | 0.018   |
| Single-item mMDS                                                    |                 |                 |                 |                    |         |
| -Fast/take-out food consumption, mean (SD)                          | 2.8 (1.2)       | 2.7 (1.1)       | 2.6 (1.1)       | 2.3 (1.2)          | <0.001  |
| -Fruit and vegetable consumption <sup>3</sup> , mean (SD)           | 2.2 (1.8)       | 2.3 (1.9)       | 2.1 (1.7)       | 2.0 (1.7)          | 0.109   |
| -Sweet desserts consumption, mean (SD)                              | 2.6 (1.2)       | 2.7 (1.2)       | 2.8 (1.1)       | 2.8 (1.2)          | 0.389   |
| -Primary cooking oil/fat use at home, mean (SD)                     | 2.2 (1.6)       | 2.6 (1.5)       | 2.4 (1.5)       | 2.6 (1.6)          | 0.391   |
| -Secondary cooking oil/fat used at home, mean (SD)                  | 1.8 (1.6)       | 1.8 (1.5)       | 1.9 (1.5)       | 1.9 (1.5)          | 0.239   |
| -Primary cooking oil/fat use at work, mean (SD)                     | 1.9 (1.4)       | 2.0 (1.3)       | 2.1 (1.4)       | 2.2 (1.3)          | 0.088   |
| -Secondary cooking oil/fat used at work, mean (SD)                  | 1.7 (1.7)       | 1.7 (1.6)       | 1.8 (1.5)       | 1.7 (1.6)          | 0.952   |
| -Fried food consumption, mean (SD)                                  | 2.2 (0.9)       | 2.2 (0.9)       | 2.2 (0.9)       | 2.0 (1.0)          | 0.146   |
| -Breads/starches consumed at home, mean (SD)                        | 2.6 (1.9)       | 2.6 (1.9)       | 2.6 (1.8)       | 2.3 (1.9)          | 0.647   |
| -Breads/starches consumed at work, mean (SD)                        | 1.7 (1.7)       | 1.5 (1.7)       | 1.8 (1.8)       | 1.8 (1.8)          | 0.358   |
| -Ocean fish consumption, mean (SD)                                  | 1.6 (0.9)       | 1.5 (0.7)       | 1.5 (0.8)       | 1.5 (0.7)          | 0.829   |
| -Drinks taken with meals at home, mean (SD)                         | 2.9 (1.6)       | 2.6 (1.7)       | 2.3 (1.7)       | 2.1 (1.7)          | <0.001  |
| -Drinks taken with meals at work, mean (SD)                         | 2.7 (1.7)       | 2.6 (1.7)       | 2.5 (1.6)       | 1.9 (1.8)          | 0.002   |
| -Quantity of alcoholic beverages, mean (SD)                         | 2.1 (1.6)       | 2.1 (1.5)       | 2.0 (1.5)       | 1.8 (1.6)          | 0.093   |
| -Wine consumption, mean (SD)                                        | 0.1 (0.4)       | 0.1 (0.5)       | 0.2 (0.5)       | 0.1 (0.5)          | 0.667   |
| Total mMDS, mean (SD)                                               | 21.7 (5.5)      | 21.6 (5.4)      | 21.0 (5.7)      | 19.8 (5.6)         | 0.008   |

<sup>1</sup>Nonparametric test for trend (Cuzick) performed for all columns except current smokers, where score test for trend was performed.

<sup>2</sup>Information available for 244 subjects.

<sup>3</sup>Score doubled due to combining two different domains.

Abbreviations: BMI, body mass index (kg/m<sup>2</sup>); ETT, exercise treadmill test; IQR, interquartile range; max, maximum; METS, metabolic equivalents; SD, standard deviation. doi:10.1371/journal.pone.0087539.t001

benefits of a traditional, fully compliant Mediterranean diet. In other words, the effects of an intervention study that educated the participants and prescribed a specific Mediterranean diet might be expected to be even greater.

HDL-c and LDL-c are well-established independent risk factors for CVD. [29] Although previous research has observed positive changes in lipid profiles in groups adhering to Mediterranean diet, those studies were primarily conducted in older subjects, those with pre-existing conditions, and/or Mediterranean cohorts; and most of them did not observe significant findings in HDL-c after covariate adjustment. [3,9,16,17,30] In our cohort, we observed significantly higher HDL-c and lower LDL-c in those with greater mMDS, in both multivariate analyses of variance and liner regression models after covariate adjustment. Our study is the first to observe these relationships with Mediterranean-style diet in a group of young working adults in the U.S.

The potential protective effect of a higher mMDS on metabolic syndrome, which has been well correlated with increased CHD and overall mortality [31], was another significant finding in this study. Participants in the highest quartile of mMDS compared to the lowest quartile had a 35% lower risk for the presence of an

**Distribution of the Modified Mediterranean Diet Score**  
780 Male Firefighters, US, 2008-2010

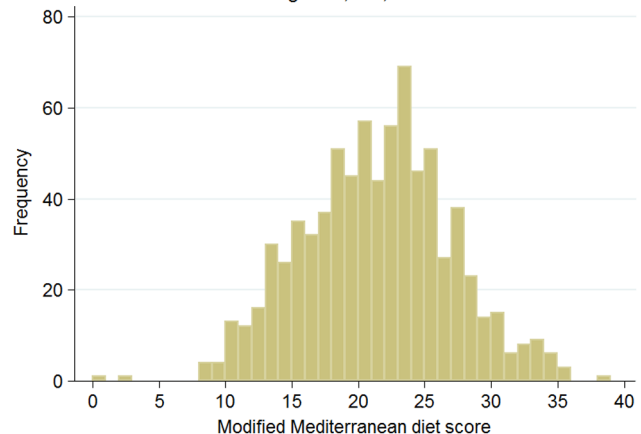

**Figure 2. Distribution of the modified Mediterranean diet score (mMDS) among 780 male subjects.**

doi:10.1371/journal.pone.0087539.g002

**Table 2.** Statistical analyses of anthropometric and metabolic variables associated with cardiovascular disease risk by quartiles of modified Mediterranean diet score (mMDS) in 780 male subjects.

| Risk factor                                            | N   | I quartile<br>≤17.5<br>(N = 194) |              | II quartile<br>17.6–21.4<br>(N = 195) |              | III quartile<br>21.5–25.0<br>(N = 190) |           | IV quartile<br>≥25.0<br>(N = 201) |                 | P value (analysis of variance) |                                            |
|--------------------------------------------------------|-----|----------------------------------|--------------|---------------------------------------|--------------|----------------------------------------|-----------|-----------------------------------|-----------------|--------------------------------|--------------------------------------------|
|                                                        |     | Mean (SD)                        | Mean (SD)    | Mean (SD)                             | Mean (SD)    | Mean (SD)                              | Mean (SD) | Unadjusted                        | Adjusted by age | Adjusted by age and BMI        | Adjusted by age, BMI and physical activity |
| Age <sup>1</sup> (years)                               | 780 | 38.2 (8.6)                       | 37.0 (8.2)   | 37.9 (9.2)                            | 37.1 (8.4)   | 0.4195                                 | 0.5448    | 0.5877                            |                 |                                |                                            |
| BMI <sup>1</sup>                                       | 780 | 29.9 (4.7)                       | 29.4 (4.6)   | 29.2 (4.2)                            | 28.7 (4.2)   | 0.0756                                 | 0.0950    | 0.6369                            |                 |                                |                                            |
| Body fat <sup>1</sup> (%)                              | 233 | 25.2 (6.8)                       | 24.4 (7.0)   | 22.7 (5.7)                            | 22.2 (6.3)   | 0.0327                                 | 0.0372    | 0.0281                            |                 |                                |                                            |
| Resting SBP <sup>1</sup> (mmHg)                        | 780 | 122.4 (12.6)                     | 121.8 (12.7) | 122.7 (11.8)                          | 122.8 (13.3) | 0.8546                                 | 0.8606    | 0.9156                            |                 |                                |                                            |
| Resting DBP <sup>1</sup> (mmHg)                        | 780 | 80.4 (8.5)                       | 79.7 (7.6)   | 79.2 (7.8)                            | 79.9 (8.2)   | 0.5749                                 | 0.5812    | 0.6219                            |                 |                                |                                            |
| Resting HR <sup>1</sup> (bpm)                          | 780 | 71.5 (11.6)                      | 68.9 (11.2)  | 69.5 (11.3)                           | 68.2 (11.5)  | 0.0220                                 | 0.0316    | 0.4126                            |                 |                                |                                            |
| Percentage of max. HR achieved during ETT <sup>1</sup> | 765 | 98.0 (6.5)                       | 98.4 (6.2)   | 98.5 (6.3)                            | 98.1 (5.3)   | 0.7963                                 | 0.7920    | 0.7796                            |                 |                                |                                            |
| METS <sup>2</sup>                                      | 766 | 12.3 (1.2)                       | 12.7 (1.1)   | 12.7 (1.1)                            | 13.0 (1.1)   | 0.0002                                 | 0.0003    | 0.3784                            |                 |                                |                                            |
| Triglycerides <sup>2,3</sup> (mg/dL)                   | 780 | 140.4 (1.8)                      | 125.8 (1.7)  | 122.8 (1.7)                           | 115.8 (1.8)  | 0.0065                                 | 0.0093    | 0.4604                            |                 |                                |                                            |
| Total cholesterol <sup>2,3</sup> (mg/dL)               | 780 | 196.5 (1.3)                      | 191.0 (1.2)  | 191.4 (1.2)                           | 186.3 (1.2)  | 0.0567                                 | 0.0926    | 0.3275                            |                 |                                |                                            |
| LDL-cholesterol <sup>2,3</sup> (mg/dL)                 | 759 | 120.3 (1.3)                      | 117.0 (1.4)  | 115.0 (1.4)                           | 110.2 (1.3)  | 0.0328                                 | 0.0427    | 0.0982                            |                 |                                |                                            |
| HDL-cholesterol <sup>2,3</sup> (mg/dL)                 | 780 | 41.7 (1.3)                       | 43.9 (1.3)   | 44.2 (1.3)                            | 46.6 (1.3)   | 0.0001                                 | 0.0001    | 0.0258                            |                 |                                |                                            |
| Total cholesterol/HDL <sup>2,3</sup>                   | 780 | 4.7 (1.4)                        | 4.4 (1.3)    | 4.3 (1.4)                             | 4.0 (1.3)    | <0.0001                                | <0.0001   | 0.0035                            |                 |                                |                                            |
| Blood sugar <sup>2,3</sup> (mg/dL)                     | 780 | 93.2 (1.2)                       | 92.6 (1.2)   | 92.9 (1.2)                            | 91.1 (1.2)   | 0.5690                                 | 0.6896    | 0.9289                            |                 |                                |                                            |

<sup>1</sup>Arithmetic mean and standard deviation.<sup>2</sup>Geometric mean and standard deviation.<sup>3</sup>Analysis of variance performed using log-transformed dependent variable.

Abbreviations: BMI, body mass index; DBP, diastolic blood pressure; bpm, beats per minute; ETT, exercise treadmill test; HDL, high-density lipoprotein; HR, heart rate; LDL, low-density lipoprotein; METS, metabolic equivalents; SD, standard deviation, SBP, systolic blood pressure.

doi:10.1371/journal.pone.0087539.t002

**Table 3.** Effect of a unitary increase in the modified Mediterranean diet score (mMDS) on anthropometric and metabolic variables related to cardiovascular disease risk and in 780 male subjects. B coefficient from linear regression models<sup>1</sup>.

| Dependent variable                         | Mean (SD)    | Linear regression models |        |        |                 |        |        |                         |        |        |                                            |        |       |
|--------------------------------------------|--------------|--------------------------|--------|--------|-----------------|--------|--------|-------------------------|--------|--------|--------------------------------------------|--------|-------|
|                                            |              | Unadjusted               |        |        | Adjusted by age |        |        | Adjusted by age and BMI |        |        | Adjusted by age, BMI and physical activity |        |       |
|                                            |              | $\beta$                  | Change | P      | $\beta$         | Change | P      | $\beta$                 | Change | P      | $\beta$                                    | Change | P     |
| BMI <sup>2,5</sup>                         | 29.3 (4.4)   | -0.087                   | -0.3%  | 0.002  | -0.082          | -0.3%  | 0.004  |                         |        |        | -0.051                                     | -0.2%  | 0.093 |
| Body fat <sup>2,5</sup> (%)                | 23.6 (6.6)   | -0.248                   | -1.1%  | 0.002  | -0.216          | -0.9%  | 0.006  | -0.075                  | -0.3%  | 0.121  | -0.042                                     | -0.2%  | 0.404 |
| Resting SBP <sup>2,5</sup> (mmHg)          | 122.3 (12.7) | 0.041                    | 0.0%   | 0.612  | 0.061           | 0.0%   | 0.452  | 0.113                   | +0.1%  | 0.156  | 0.055                                      | 0.0%   | 0.515 |
| Resting DBP <sup>2,5</sup> (mmHg)          | 80.0 (8.1)   | -0.047                   | -0.1%  | 0.368  | -0.036          | 0.0%   | 0.494  | 0.008                   | 0.0%   | 0.874  | 0.007                                      | 0.0%   | 0.899 |
| Resting HR <sup>2,5</sup> (bpm)            | 69.4 (11.5)  | -0.259                   | -0.4%  | <0.001 | -0.246          | -0.4%  | 0.001  | -0.200                  | -0.3%  | 0.006  | -0.107                                     | -0.2%  | 0.157 |
| % Maximum HR during ETT <sup>2,5</sup>     | 98.3 (6.1)   | 0.002                    | 0%     | 0.957  | 0.004           | 0.0%   | 0.926  | -0.010                  | 0.0%   | 0.806  | 0.011                                      | 0.0%   | 0.796 |
| METS <sup>3,4,6</sup>                      | 12.7 (1.1)   | 0.005                    | +0.5%  | <0.001 | 0.004           | +0.4%  | <0.001 | 0.003                   | +0.3%  | <0.001 | 0.002                                      | +0.2%  | 0.028 |
| Triglycerides <sup>3,4,6</sup> (mg/dL)     | 125.1 (1.8)  | -0.013                   | -1.3%  | <0.001 | -0.013          | -1.3%  | <0.001 | -0.010                  | -1.0%  | 0.005  | -0.005                                     | -0.5%  | 0.189 |
| Total cholesterol <sup>3,4,6</sup> (mg/dL) | 191.1 (1.2)  | -0.004                   | -0.4%  | 0.003  | -0.003          | -0.3%  | 0.007  | -0.003                  | -0.3%  | 0.014  | -0.003                                     | -0.3%  | 0.055 |
| LDL-cholesterol <sup>3,4,6</sup> (mg/dL)   | 115.6 (1.4)  | -0.006                   | -0.6%  | 0.004  | -0.005          | -0.5%  | 0.010  | -0.005                  | -0.5%  | 0.018  | -0.004                                     | -0.4%  | 0.040 |
| HDL-cholesterol <sup>3,4,6</sup> (mg/dL)   | 44.1 (1.3)   | 0.007                    | +0.7%  | <0.001 | 0.007           | +0.7%  | <0.001 | 0.006                   | +0.6%  | <0.001 | 0.004                                      | +0.4%  | 0.008 |
| Total cholesterol/HDL <sup>3,4,6</sup>     | 4.3 (1.4)    | -0.011                   | -1.1%  | <0.001 | -0.011          | -1.1%  | <0.001 | -0.009                  | -0.9%  | <0.001 | -0.007                                     | -0.7%  | 0.001 |
| Blood sugar <sup>3,4,6</sup> (mg/dL)       | 92.4 (1.2)   | -0.001                   | -0.1%  | 0.310  | -0.001          | -0.1%  | 0.544  | 0.000                   | 0.0%   | 0.926  | 0.000                                      | 0.0%   | 0.672 |

<sup>1</sup>Number of subjects with complete data: 780, except for body fat % (n = 233), % maximum HR during ETT (n = 765), METS (n = 766) and LDL-cholesterol (n = 759).

<sup>2</sup>Arithmetic mean and standard deviation.

<sup>3</sup>Geometric mean and standard deviation.

<sup>4</sup>Linear regression model conducted on a log-transformed dependent variable.

<sup>5</sup>Percent change in the arithmetic mean of the dependent variable per unitary increase in the Mediterranean diet score.

<sup>6</sup>Percent change in the geometric mean of the dependent variable per unitary increase in the Mediterranean diet score.

Abbreviations: BMI, body mass index; DBP, diastolic blood pressure; bpm, beats per minute; ETT, exercise treadmill test; HDL, high-density lipoprotein; HR, heart rate; LDL, low-density lipoprotein; METS, metabolic equivalents; SD, standard deviation, SBP, systolic blood pressure.

doi:10.1371/journal.pone.0087539.t003

additional metabolic syndrome component after adjustment for age and physical activity. Therefore, our results suggest adherence to a Mediterranean-pattern diet in a young and active cohort could potentially reduce CVD-risk clustering and metabolic syndrome prevalence.

A trend in reduction of total mMDS associated with obesity was also observed. This finding is in agreement with previous studies suggesting subjects with better adherence to Mediterranean diet were less likely to be obese. [32–34] In this study, we expanded this inverse relation with the observation of a consistent trend in reported weight gain over the past 5 years among those with lower mMDS even after multivariate adjustment that included physical activity. We also observed significantly higher maximal METS achieved in the entire cohort, as well as lower body fat with higher mMDS in the subgroup of 233 participants who had this assessed. Therefore, we hypothesize that adherence to the Mediterranean diet can positively influence fitness and body composition.

Our study also revealed interesting findings regarding beverage consumption. The intake of sweetened beverages, which are not traditionally part of a Mediterranean diet, are well known to be correlated with obesity and increased cardiovascular risk. [1,35–37] Sugary drinks are considered the greatest contributor to added-sugar intake in the U.S. [36,38,39] Therefore, we believe sweetened beverage consumption is an important dietary determinant and should be incorporated into the Mediterranean diet scoring systems. Additionally, contrary to patterns observed in traditional Mediterranean countries, we observed very low wine consumption. This was likely the result of socio-cultural preferences, where 60% of our participants reported beer as their

drink-of-choice. Educating existing drinkers in similar groups of workers on avoiding alcoholic beverages lacking important antioxidant properties might be an area of interest.

The finding that subjects with lower body fat/BMI and higher physical activity level had lower scores in fast/take-out food consumption further agrees with studies that associated fast-food consumption with obesity [40–42] and cardiometabolic risk. [43] While consumption of fast/take-out foods is very prevalent among the U.S. working population, [44,45] further research on educating employees about healthier food and introducing Mediterranean-style choices at work in different occupational cohorts could be a way to curtail the current obesity epidemic in the U.S. [46,47].

Our study has several limitations. First, our life-style questionnaire was originally designed to obtain general dietary information, rather than assess a specific diet pattern. Therefore, information on total energy intake and certain traditional Mediterranean food domains (e.g. nuts and legumes) were not collected and accounted for in the analyses. However, we believe that these two food groups are not highly consumed in the population studied and therefore, would not have influenced scores very much. We were also limited in our ability to assess the associations of ocean fish consumption by the very low consumption observed in our cohort likely due to its geographic setting in U.S. Midwest. Similarly, only a small proportion of our study population were regular wine drinkers. Thus, we had limited statistical power to study the possible beneficial effects of moderate wine consumption. Nonetheless, our questionnaire did address the majority of the essential components of a traditional



Mediterranean diet. Additionally, our survey more accurately reflected dietary patterns in a working U.S. population with additional categories tailored to “American” eating habits inconsistent with a Mediterranean diet, as well as questions that assessed potential differences for consumption patterns at work compared to in the home. As our participants were only informed that the study was related to heart disease, they were not aware that Mediterranean diet or any other specific diet was of interest to the overall study. This fact likely decreased reporting bias; although we cannot completely rule out bias based on widespread popular knowledge of more and less “heart healthy” foods. [32].

To the best of our knowledge, this study is the first to assess Mediterranean-style diet adherence and CVD risk factors in a young, working cohort in the U.S. The main strength of our study is the homogeneous population that minimized confounding factors such as gender or socioeconomic differences (e.g., educational level, income or occupation). Also, the study of dietary patterns within a well-defined occupational group allows indirect control for job-related psychosocial factors, which are known to be determinants of eating awareness. [48] Another strength is our data collection procedures: anthropometric, clinical and laboratory data were collected using standardized procedures, and the biological plausibility of the observed relationships across different CVD risk parameters in this cohort has been verified in previous studies of physical activity, obesity and physical fitness. [25,26,49] Thus, it is very unlikely that our findings are due to chance or bias.

## References

- Mozaffarian D, Hao T, Rimm EB, Willett WC, Hu FB (2011) Changes in diet and lifestyle and long-term weight gain in women and men. *N Engl J Med* 364: 2392–2404.
- Mitrou PN, Kipnis V, Thiebaut AC, Reedy J, Subar AF, et al. (2007) Mediterranean dietary pattern and prediction of all-cause mortality in a US population: results from the NIH-AARP Diet and Health Study. *Arch Intern Med* 167: 2461–2468.
- Leighton F, Polic G, Strobel P, Perez D, Martinez C, et al. (2009) Health impact of Mediterranean diets in food at work. *Public Health Nutr* 12: 1635–1643.
- Trichopoulou A, Kouris-Blazos A, Wahlqvist ML, Gnardellis C, Lagiou P, et al. (1995) Diet and overall survival in elderly people. *BMJ* 311: 1457–1460.
- Trichopoulou A, Bamia C, Trichopoulos D (2009) Anatomy of health effects of Mediterranean diet: Greek EPIC prospective cohort study. *BMJ* 338: b2337.
- Trichopoulou A, Orfanos P, Norat T, Bueno-de-Mesquita B, Ocke MC, et al. (2005) Modified Mediterranean diet and survival: EPIC-elderly prospective cohort study. *BMJ* 330: 991.
- Knoops KT, de Groot LC, Kromhout D, Perrin AE, Moreiras-Varela O, et al. (2004) Mediterranean diet, lifestyle factors, and 10-year mortality in elderly European men and women: the HALE project. *JAMA* 292: 1433–1439.
- Babio N, Bullo M, Salas-Salvado J (2009) Mediterranean diet and metabolic syndrome: the evidence. *Public Health Nutr* 12: 1607–1617.
- Vincent-Baudry S, Defoort C, Gerber M, Bernard MC, Verger P, et al. (2005) The Medi-RIVAGE study: reduction of cardiovascular disease risk factors after a 3-mo intervention with a Mediterranean-type diet or a low-fat diet. *Am J Clin Nutr* 82: 964–971.
- Panagiotakos DB, Pitsavos CH, Chrysohou C, Skoumas J, Papadimitriou L, et al. (2003) Status and management of hypertension in Greece: role of the adoption of a Mediterranean diet: the Attica study. *J Hypertens* 21: 1483–1489.
- Kafatos A, Diacatou A, Voukiklaris G, Nikolakakis N, Vlachonikolis J, et al. (1997) Heart disease risk-factor status and dietary changes in the Cretan population over the past 30 y: the Seven Countries Study. *Am J Clin Nutr* 65: 1882–1886.
- Estruch R, Ros E, Salas-Salvado J, Covas MI, Corella D, et al. (2013) Primary prevention of cardiovascular disease with a Mediterranean diet. *N Engl J Med* 368: 1279–1290.
- Martinez-Gonzalez MA, Garcia-Lopez M, Bes-Rastrollo M, Toledo E, Martinez-Lapiscina EH, et al. (2011) Mediterranean diet and the incidence of cardiovascular disease: a Spanish cohort. *Nutr Metab Cardiovasc Dis* 21: 237–244.
- Fung TT, Rexrode KM, Mantzoros CS, Manson JE, Willett WC, et al. (2009) Mediterranean diet and incidence of and mortality from coronary heart disease and stroke in women. *Circulation* 119: 1093–1100.
- Sofi F, Abbate R, Gensini GF, Casini A (2010) Accruing evidence on benefits of adherence to the Mediterranean diet on health: an updated systematic review and meta-analysis. *Am J Clin Nutr* 92: 1189–1196.
- Schwarzfuchs D, Golan R, Shai I (2012) Four-year follow-up after two-year dietary interventions. *N Engl J Med* 367: 1373–1374.
- Di Daniele N, Petramala L, Di Renzo L, Sarlo F, Della Rocca DG, et al. (2013) Body composition changes and cardiometabolic benefits of a balanced Italian Mediterranean Diet in obese patients with metabolic syndrome. *Acta Diabetol* 50: 409–416.
- Baur DM, Christophi CA, Tsismenakis AJ, Jahnke SA, Kales SN (2012) Weight-perception in male career firefighters and its association with cardiovascular risk factors. *BMC Public Health* 12: 480.
- Durand G, Tsismenakis AJ, Jahnke SA, Baur DM, Christophi CA, et al. (2011) Firefighters’ physical activity: relation to fitness and cardiovascular disease risk. *Med Sci Sports Exerc* 43: 1752–1759.
- Ronskley PE, Brien SE, Turner BJ, Mukamal KJ, Ghali WA (2011) Association of alcohol consumption with selected cardiovascular disease outcomes: a systematic review and meta-analysis. *BMJ* 342: d671.
- Urquiza I, Strobel P, Perez D, Martinez C, Cuevas A, et al. (2010) Mediterranean diet and red wine protect against oxidative damage in young volunteers. *Atherosclerosis* 211: 694–699.
- Alcacer MA, Marques-Lopes I, Fajo-Pascual M, Foncillas JP, Carmona-Torre F, et al. (2008) Alcoholic beverage preference and dietary pattern in Spanish university graduates: the SUN cohort study. *Eur J Clin Nutr* 62: 1178–1186.
- Nadtochiy SM, Redman EK (2011) Mediterranean diet and cardioprotection: the role of nitrite, polyunsaturated fatty acids, and polyphenols. *Nutrition* 27: 733–744.
- Leiba A, Baur DM, Kales SN (2013) Exercise-induced hypertension among healthy firefighters—a comparison between two different definitions. *J Am Soc Hypertens* 7: 40–45.
- Baur DM, Christophi CA, Cook EF, Kales SN (2012) Age-Related Decline in Cardiorespiratory Fitness among Career Firefighters: Modification by Physical Activity and Adiposity. *J Obes* 2012: 710903.
- Baur DM, Christophi CA, Kales SN (2012) Metabolic syndrome is inversely related to cardiorespiratory fitness in male career firefighters. *J Strength Cond Res* 26: 2331–2337.
- Alberti KG, Eckel RH, Grundy SM, Zimmet PZ, Cleeman JI, et al. (2009) Harmonizing the metabolic syndrome: a joint interim statement of the International Diabetes Federation Task Force on Epidemiology and Prevention; National Heart, Lung, and Blood Institute; American Heart Association; World Heart Federation; International Atherosclerosis Society; and International Association for the Study of Obesity. *Circulation* 120: 1640–1645.
- Royston P (1991) sg3.5: Comment on sg3.4 and an improved D’Agostino test. *Stata Technical Bulletin Reprints*. College Station, TX: Stata Press. pp. 110–112.
- Wilson PW, D’Agostino RB, Levy D, Belanger AM, Silbershatz H, et al. (1998) Prediction of coronary heart disease using risk factor categories. *Circulation* 97: 1837–1847.

## Supporting Information

**Table S1 Questions extracted from the life-style questionnaire that constructed the modified Mediterranean diet score (mMDS) system.**

(DOC)

**Method S1 Calculation of the modified Mediterranean diet score (mMDS).**

(DOC)

## Author Contributions

Conceived and designed the experiments: SNK. Analyzed the data: AF. Wrote the paper: JY AF MK. Interpretation of the results: JY AF MK SNK. Revised the article critically for important intellectual content: JY AF MK SNK. Approved the final version to be published: JY AF MK SNK.



30. Esposito K, Marfella R, Ciotola M, Di Palo C, Giugliano F, et al. (2004) Effect of a mediterranean-style diet on endothelial dysfunction and markers of vascular inflammation in the metabolic syndrome: a randomized trial. *JAMA* 292: 1440–1446.
31. Wannamethee SG, Shaper AG, Lennon L, Morris RW (2005) Metabolic syndrome vs Framingham Risk Score for prediction of coronary heart disease, stroke, and type 2 diabetes mellitus. *Arch Intern Med* 165: 2644–2650.
32. Bonaccio M, Di Castelnuovo A, Costanzo S, De Lucia F, Olivieri M, et al. (2013) Nutrition knowledge is associated with higher adherence to Mediterranean diet and lower prevalence of obesity. Results from the Moli-sani study. *Appetite* 68C: 139–146.
33. Martínez-González MA, García-Arellano A, Toledo E, Salas-Salvado J, Buil-Cosiales P, et al. (2012) A 14-item Mediterranean diet assessment tool and obesity indexes among high-risk subjects: the PREDIMED trial. *PLoS One* 7: e43134.
34. Shai I, Schwarzfuchs D, Henkin Y, Shahar DR, Witkow S, et al. (2008) Weight loss with a low-carbohydrate, Mediterranean, or low-fat diet. *N Engl J Med* 359: 229–241.
35. Malik VS, Schulze MB, Hu FB (2006) Intake of sugar-sweetened beverages and weight gain: a systematic review. *Am J Clin Nutr* 84: 274–288.
36. Malik VS, Popkin BM, Bray GA, Despres JP, Hu FB (2010) Sugar-sweetened beverages, obesity, type 2 diabetes mellitus, and cardiovascular disease risk. *Circulation* 121: 1356–1364.
37. Woodward-Lopez G, Kao J, Ritchie L (2011) To what extent have sweetened beverages contributed to the obesity epidemic? *Public Health Nutr* 14: 499–509.
38. Guthrie JF, Morton JF (2000) Food sources of added sweeteners in the diets of Americans. *J Am Diet Assoc* 100: 43–51, quiz 49–50.
39. Nielsen SJ, Popkin BM (2004) Changes in beverage intake between 1977 and 2001. *Am J Prev Med* 27: 205–210.
40. Pereira MA, Kartashov AI, Ebbeling CB, Van Horn L, Slattery ML, et al. (2005) Fast-food habits, weight gain, and insulin resistance (the CARDIA study): 15-year prospective analysis. *Lancet* 365: 36–42.
41. Duffley KJ, Steffen LM, Van Horn L, Jacobs DR, Jr., Popkin BM (2012) Dietary patterns matter: diet beverages and cardiometabolic risks in the longitudinal Coronary Artery Risk Development in Young Adults (CARDIA) Study. *Am J Clin Nutr* 95: 909–915.
42. Nettleton JA, Polak JF, Tracy R, Burke GL, Jacobs DR, Jr. (2009) Dietary patterns and incident cardiovascular disease in the Multi-Ethnic Study of Atherosclerosis. *Am J Clin Nutr* 90: 647–654.
43. Odegaard AO, Koh WP, Yuan JM, Gross MD, Pereira MA (2012) Western-style fast food intake and cardiometabolic risk in an Eastern country. *Circulation* 126: 182–188.
44. Nagler EM, Viswanath K, Ebbeling CB, Stoddard AM, Sorensen G (2013) Correlates of fruit and vegetable consumption among construction laborers and motor freight workers. *Cancer Causes Control* 24: 637–647.
45. Blanck HM, Yaroch AL, Atienza AA, Yi SL, Zhang J, et al. (2009) Factors influencing lunchtime food choices among working Americans. *Health Educ Behav* 36: 289–301.
46. Binkley JK, Eales J, Jekanowski M (2000) The relation between dietary change and rising US obesity. *Int J Obes Relat Metab Disord* 24: 1032–1039.
47. Biener L, Glanz K, McLerran D, Sorensen G, Thompson B, et al. (1999) Impact of the Working Well Trial on the worksite smoking and nutrition environment. *Health Educ Behav* 26: 478–494.
48. Barrington WE, Ceballos RM, Bishop SK, McGregor BA, Beresford SA (2012) Perceived stress, behavior, and body mass index among adults participating in a worksite obesity prevention program, Seattle, 2005–2007. *Prev Chronic Dis* 9: E152.
49. Baur DM, Christophi CA, Tsismenakis AJ, Cook EF, Kales SN (2011) Cardiorespiratory fitness predicts cardiovascular risk profiles in career firefighters. *J Occup Environ Med* 53: 1155–1160.
